# Supplementary material for: Niclosamide inhibits the cell proliferation and enhances the responsiveness of esophageal cancer cells to chemotherapeutic agents
Source: PubMed Central journal article supplement — Oncol Rep. 2019 Dec 27;43(2):549–61. doi: 10.3892/or.2019.7449 (PMC6967135; doi:10.3892/or.2019.7449), 2019-12-27

Figure S1. Low dose of niclosamide treatment causes 81T cell cycle arrest. 48T, 81T and BE3 cells were treated with 2.5  $\mu$ M niclosamide for 48 or 72 h. Cells were stained with PI for DNA content and analyzed by flow cytometry. The relative proportion of the sub-G1 cells was indicated. PI, propidium iodide.

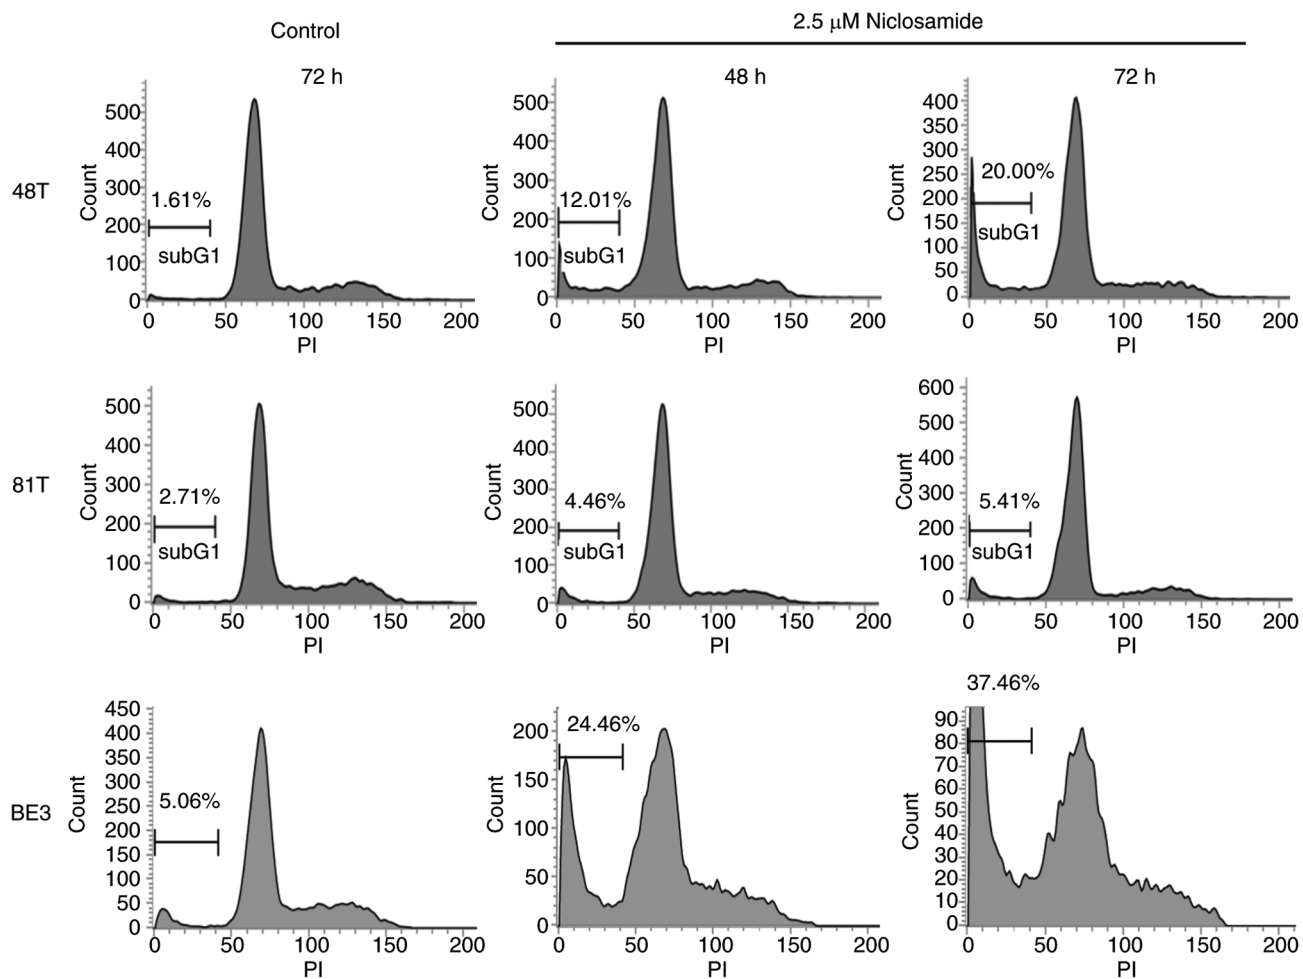

Supplement: Supplementary_Data.pdf [file Supplementary_Data.pdf]
